# Supplementary material for: Repeatability of Peripapillary OCT Angiography in Neurodegenerative Disease
Source: PubMed Central journal article supplement — Ophthalmol Sci. 2021 Nov 13;1(4):100075. doi: 10.1016/j.xops.2021.100075 (PMC9559083; doi:10.1016/j.xops.2021.100075), 2021-11-13
Supplement: mmc1.pdf [file mmc1.pdf]

## Supplementary Figure 1: Bland-Altman plots of average capillary perfusion density

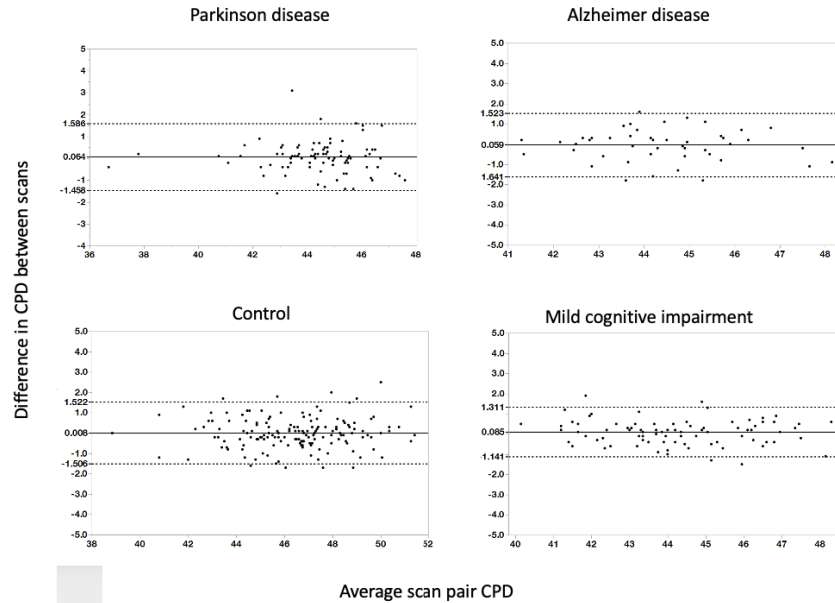

**Supplementary Figure 1:** Bland-Altman plots for average capillary perfusion density: plotting the average of each pair of repeated scans against the difference between the constituent values of said pair of scans. The limits of agreement,  $1.96 + 1.96\sigma$  and  $-1.96\sigma$  for difference, is plotted in the dotted lines.
