# Supplementary material for: Repeatability of Peripapillary OCT Angiography in Neurodegenerative Disease
Source: PubMed Central journal article supplement — Ophthalmol Sci. 2021 Nov 13;1(4):100075. doi: 10.1016/j.xops.2021.100075 (PMC9559083; doi:10.1016/j.xops.2021.100075), 2021-11-13
Supplement: mmc3.pdf [file mmc3.pdf]

**Supplementary Table 1: Capillary perfusion density quantitative intra-session differences**

| <b>Diagnosis</b> |                                      | <b>Alzheimer disease</b> | <b>Mild cognitive impairment</b> | <b>Parkinson disease</b> | <b>Normal cognition</b> | <b>Between-group p**</b> |
|------------------|--------------------------------------|--------------------------|----------------------------------|--------------------------|-------------------------|--------------------------|
| <b>N (eyes)</b>  |                                      | 46                       | 85                               | 87                       | 156                     |                          |
| <b>Average</b>   | <b>Mean <math>\Delta</math> (SD)</b> | 0.06<br>(0.79)           | 0.08<br>(0.61)                   | 0.06<br>(0.76)           | 0.01<br>(0.76)          | 0.671                    |
|                  | <b>%<math>\Delta</math></b>          | 0.14%                    | 0.18%                            | 0.13%                    | 0.02%                   |                          |
|                  | <b>Within-group p*</b>               | 0.739                    | 0.503                            | 0.225                    | 0.943                   |                          |
| <b>Superior</b>  | <b>Mean <math>\Delta</math> (SD)</b> | 0.17<br>(1.57)           | 0.08<br>(1.28)                   | 0.04<br>(1.06)           | 0.13<br>(1.21)          | 0.675                    |
|                  | <b>%<math>\Delta</math></b>          | 0.39%                    | 0.19%                            | 0.09%                    | 0.30%                   |                          |
|                  | <b>Within-group p*</b>               | 0.364                    | 0.665                            | 0.737                    | 0.298                   |                          |
| <b>Nasal</b>     | <b>Mean <math>\Delta</math> (SD)</b> | 0.34<br>(2.15)           | 0.03<br>(1.36)                   | 0.04<br>(1.41)           | 0.02<br>(1.79)          | 0.936                    |
|                  | <b>%<math>\Delta</math></b>          | 0.78%                    | 0.07%                            | 0.09%                    | 0.05%                   |                          |
|                  | <b>Within-group p*</b>               | 0.435                    | 0.996                            | 0.780                    | 0.760                   |                          |
| <b>Inferior</b>  | <b>Mean <math>\Delta</math> (SD)</b> | 0.42<br>(1.50)           | 0.18<br>(1.26)                   | 0.01<br>(1.30)           | 0.04<br>(1.28)          | 0.180                    |
|                  | <b>%<math>\Delta</math></b>          | 0.95%                    | 0.41%                            | 0.02%                    | 0.09%                   |                          |
|                  | <b>Within-group p*</b>               | 0.087                    | 0.781                            | 0.128                    | 0.876                   |                          |
| <b>Temporal</b>  | <b>Mean <math>\Delta</math> (SD)</b> | 0.59<br>(1.74)           | 0.23<br>(1.78)                   | 0.10<br>(1.72)           | 0.26<br>(1.65)          | 0.449                    |
|                  | <b>%<math>\Delta</math></b>          | 1.26%                    | 0.49%                            | 0.21%                    | 0.56%                   |                          |
|                  | <b>Within-group p*</b>               | 0.062                    | 0.869                            | 0.298                    | 0.073                   |                          |

\*Within-group p calculated using the Wilcoxon signed rank test of median difference.

\*\*Between-group p calculated using the Kruskal-Wallis test of difference among medians.
