# Supplementary material for: Repeatability of Peripapillary OCT Angiography in Neurodegenerative Disease
Source: PubMed Central journal article supplement — Ophthalmol Sci. 2021 Nov 13;1(4):100075. doi: 10.1016/j.xops.2021.100075 (PMC9559083; doi:10.1016/j.xops.2021.100075), 2021-11-13
Supplement: mmc4.pdf [file mmc4.pdf]

**Supplementary Table 2: Capillary flux index quantitative intra-session differences**

| <b>Diagnosis</b> |                                      | <b>Alzheimer disease</b> | <b>Mild cognitive impairment</b> | <b>Parkinson disease</b> | <b>Normal cognition</b> | <b>Between-group p**</b> |
|------------------|--------------------------------------|--------------------------|----------------------------------|--------------------------|-------------------------|--------------------------|
| <b>N (eyes)</b>  |                                      | 46                       | 85                               | 87                       | 156                     |                          |
| <b>Average</b>   | <b>Mean <math>\Delta</math> (SD)</b> | 0.003<br>(0.018)         | >0.0005<br>(0.016)               | -0.001<br>(0.014)        | -0.003<br>(0.017)       | 0.355                    |
|                  | <b>%<math>\Delta</math></b>          | 0.71%                    | >0.12%                           | 0.23%                    | 0.69%                   |                          |
|                  | <b>Within-group p*</b>               | 0.253                    | 0.901                            | 0.944                    | 0.169                   |                          |
| <b>Superior</b>  | <b>Mean <math>\Delta</math> (SD)</b> | 0.002<br>(0.016)         | >0.0005<br>(0.019)               | -0.001<br>(0.015)        | -0.002<br>(0.020)       | 0.542                    |
|                  | <b>%<math>\Delta</math></b>          | 0.48%                    | >0.12%                           | 0.24%                    | 0.47%                   |                          |
|                  | <b>Within-group p*</b>               | 0.288                    | 0.741                            | 0.917                    | 0.410                   |                          |
| <b>Nasal</b>     | <b>Mean <math>\Delta</math> (SD)</b> | 0.003<br>(0.026)         | -0.003<br>(0.027)                | >0.0005<br>(0.018)       | -0.003<br>(0.021)       | 0.125                    |
|                  | <b>%<math>\Delta</math></b>          | 0.72%                    | 0.71%                            | >0.12%                   | 0.69%                   |                          |
|                  | <b>Within-group p*</b>               | 0.223                    | 0.434                            | 0.378                    | 0.065                   |                          |
| <b>Inferior</b>  | <b>Mean <math>\Delta</math> (SD)</b> | 0.001<br>(0.019)         | 0.001<br>(0.016)                 | >0.0005<br>(0.018)       | -0.001<br>(0.017)       | 0.886                    |
|                  | <b>%<math>\Delta</math></b>          | 0.24%                    | 0.24%                            | >0.12%                   | 0.23%                   |                          |
|                  | <b>Within-group p*</b>               | 0.818                    | 0.407                            | 0.740                    | 0.788                   |                          |
| <b>Temporal</b>  | <b>Mean <math>\Delta</math> (SD)</b> | 0.004<br>(0.025)         | 0.005<br>(0.023)                 | -0.003<br>(0.020)        | -0.004<br>(0.027)       | 0.058                    |
|                  | <b>%<math>\Delta</math></b>          | 0.92%                    | 1.12%                            | 0.67%                    | 0.88%                   |                          |
|                  | <b>Within-group p*</b>               | 0.291                    | 0.070                            | 0.205                    | 0.208                   |                          |

\*Within-group p calculated using the Wilcoxon signed rank test of median difference.

\*\*Between-group p calculated using the Kruskal-Wallis test of difference among medians.
